# Supplementary material
Source: publisher figshare collection journal article supplement (https://tandf.figshare.com/ndownloader/files/20040146)
Supplement: Supplementary file 1 [file 20040146]

**APPENDIX**

**Table 1: Annual TBI deaths from traffic-related incidents, according to mode of transport**

| Year | Pedestrian | | Bicycle | | Motorcycle | | Car/van | | Heavy vehicle | | Totals | | Rates per 100,000 population | |
| --- | --- | --- | --- | --- | --- | --- | --- | --- | --- | --- | --- | --- | --- | --- |
|  | n | Rate/ 100,000 motor vehicles | n | Rate/ 100,000 motor vehicles | n | Rate/ 100,000 motor vehicles | n | Rate/ 100,000 motor vehicles | n | Rate/ 100,000 motor vehicles | n | Rate/ 100,000 motor vehicles | Crude | Age-standardised (95% CIs) |
| 1996 | 216 | ++ | 44 | ++ | 19 | ++ | 133 | ++ | 10 | ++ | 422 | ++ | 7.85 | 8.27 (7.46-9.20) |
| 1997 | 212 | ++ | 53 | ++ | 27 | ++ | 222 | ++ | 10 | ++ | 524 | ++ | 9.79 | 10.03 (9.15-11.01) |
| 1998 | 183 | 15.30 | 79 | 6.60 | 36 | 3.01 | 161 | 13.461 | 12 | 1.00 | 471 | 39.37 | 8.74 | 9.27 (8.41-10.23) |
| 1999 | 156 | 12.62 | 59 | 4.77 | 19 | 1.54 | 116 | 9.38 | 16 | 1.29 | 366 | 29.60 | 6.78 | 7.07 (6.32-7.91) |
|  |  |  |  |  |  |  |  |  |  |  |  |  |  |  |
| 2000 | 145 | 11.38 | 69 | 5.41 | 22 | 1.73 | 97 | 7.61 | 7 | .553 | 340 | 26.68 | 6.85 | 7.19 (6.44-8.04) |
| 2001 | 134 | 10.36 | 58 | 4.49 | 18 | 1.39 | 113 | 8.74 | 6 | .465 | 329 | 25.45 | 6.12 | 5.98 (5.32-6.73) |
| 2002 | 126 | 9.50 | 42 | 3.17 | 21 | 1.58 | 106 | 7.99 | 4 | .306 | 299 | 22.53 | 5.56 | 5.61 (4.96-6.37) |
| 2003 | 96 | 7.08 | 52 | 3.83 | 22 | 1.62 | 106 | 7.82 | 8 | .59 | 284 | 20.94 | 5.28 | 5.11 (4.51-5.82) |
| 2004 | 121 | 10.11 | 47 | 3.93 | 20 | 1.67 | 92 | 7.69 | 6 | .506 | 286 | 23.89 | 5.31 | 5.36 (4.72-6.12) |
| 2005 | 103 | 7.90 | 41 | 3.14 | 22 | 1.69 | 77 | 5.91 | 6 | .462 | 249 | 19.10 | 4.62 | 4.64 (4.06-5.34) |
| 2006 | 116 | 8.70 | 36 | 2.70 | 27 | 2.02 | 95 | 7.12 | 3 | .22 | 277 | 20.77 | 5.14 | 5.05 (4.45-5.75) |
| 2007 | 105 | 5.58 | 53 | 2.82 | 24 | 1.28 | 80 | 4.25 | 8 | .43 | 270 | 14.35 | 5.00 | 5.14 (4.51-5.87) |
| 2008 | 104 | 5.09 | 26 | 1.27 | 12 | 0.59 | 106 | 5.19 | 5 | .24 | 253 | 12.39 | 4.68 | 4.46 (3.90-5.10) |
| 2009 | 81 | 3.79 | 15 | 0.70 | 13 | 0.61 | 57 | 2.67 | 7 | .33 | 173 | 8.10 | 3.19 | 3.15 (2.68-3.71) |
| 2010 | 83 | 3.72 | 25 | 1.12 | 12 | 0.54 | 66 | 2.95 | 3 | .13 | 189 | 8.466 | 3.48 | 3.46 (2.96-4.04) |
| 2011 | 37 | 1.59 | 23 | 0.99 | 12 | 0.51 | 60 | 2.57 | 1 | .04 | 133 | 5.709 | 2.46 | 2.38 (1.98-2.86) |
| 2012 | 52 | 2.15 | 19 | 0.78 | 18 | 0.74 | 53 | 2.19 | 2 | .08 | 144 | 5.94 | 2.66 | 2.67 (2.24-3.18) |
| 2013 | 40 | 1.60 | 15 | 0.60 | 8 | 0.32 | 28 | 1.12 | 8 | .32 | 99 | 3.97 | 1.83 | 1.93 (1.55-2.39) |
| 2014 | 41 | 1.59 | 24 | 0.93 | 11 | 0.43 | 48 | 1.86 | 1 | .04 | 125 | 4.84 | 2.31 | 2.27 (1.88-2.74) |
| 2015 | 55 | 2.05 | 25 | 0.93 | 11 | 0.41 | 43 | 1.60 | 3 | .11 | 137 | 5.09 | 2.53 | 2.52 (2.11-3.01) |
|  |  |  |  |  |  |  |  |  |  |  |  |  |  |  |
| Total | 2,206 |  | 805 |  | 374 |  | 1,859 |  | 126 |  | 5,370 |  | 4.97 | 4.99 (4.85-5.14) |

++ Vehicles registered total not available for years 1996-97
